# Supplementary material for: Malaria Data Analysis Using Routine Surveillance Data, Sunyani Municipality, Ghana, 2020
Source: Research Square preprint supplement (doi:10.21203/rs.3.rs-168549/v1), 2021-02-04
Supplement: Supplementary file 1 [file d6cecaa3615a2076657b1f7c.xlsx]

## Sheet: timeliness and completeness
Sunyani Municipal - Monthly IDSR Summary Reporting Form submission
	2015						2016						2017						2018						2019
Name of sub-district	Actual Reports	Expected Reports	Percent	Reports On Time	Percent On Time		Actual Reports	Expected Reports	Percent	Reports On Time	Percent On Time		Actual Reports	Expected Reports	Percent	Reports On Time	Percent On Time		Actual Reports	Expected Reports	Percent	Reports On Time	Percent On Time		Actual Reports	Expected Reports	Percent	Reports On Time	Percent On Time		average completeness	average timeliness
Antwikrom	22	84	26.2	20	23.8		22	84	26.2	22	26.2		24	84	28.6	24	28.6		36	84	42.9	34	40.5		72	84	85.7	68	81		41.92	40.02
New Town-bakoniaba	23	108	21.3	21	19.4		12	60	20	12	20		24	108	22.2	24	22.2		36	108	33.3	34	31.5		90	108	83.3	84	77.8		36.02	34.18
Penkwase	12	60	20	12	20		21	108	19.4	21	19.4		12	60	20	11	18.3		12	60	20	12	20		48	60	80	44	73.3		31.88	30.2
New Dormaa	11	96	11.5	10	10.4		11	96	11.5	11	11.5		11	96	11.5	11	11.5		12	96	12.5	12	12.5		75	96	78.1	68	70.8		25.02	23.34
Abesim	12	108	11.1	12	11.1		12	108	11.1	12	11.1		12	108	11.1	12	11.1		12	108	11.1	12	11.1		91	120	75.8	84	70		24.04	22.88
Sunyani Central	12	120	10	11	9.2		12	120	10	12	10		12	120	10	12	10		12	120	10	11	9.2		76	108	70.4	69	63.9		22.08	20.46

## Sheet: Sub-district case distribution
Sub-districts	2019 Positive Malaria Cases
Abesim	14991
Antwikrom	7958
New Dormaa	6839
New Town-bakoniaba	12338
Penkwase	6388
Sunyani Central	13566

## Sheet: age & sex distribution of cases
Communicable non-immunizable Age Group and Gender for Patients/Morbidity
Sunyani Municipal 2016
Data element	Male , <28days	Male , 1-11mths	Male , 1-4	Male , 5-9	Male , 10-14	Male , 15-17	Male , 18-19	Male , 20-34	Male , 35-49	Male , 50-59	Male , 60-69	Male , 70+	Female, <28days	Female, 1-11mths	Female, 1-4	Female, 5-9	Female, 10-14	Female, 15-17	Female, 18-19	Female, 20-34	Female, 35-49	Female, 50-59	Female, 60-69	Female, 70+	Male	Female	<28days	1-11mths	1-4	5-9	10-14	15-17	18-19	20-34	35-49	50-59	60-69	70+	Total
Uncomplicated Malaria suspected	88	4233	15892	8087	4622	3489	2414	7069	4551	2463	1691	1487	128	3883	15474	8192	5267	3987	3067	17124	10702	5087	3005	2985	56086	78901	216	8116	31366	16279	9889	7476	5481	24193	15253	7550	4696	4472	134987
Uncomplicated Malaria Suspected Tested	85	3902	14688	7473	4271	3245	2183	6303	4077	2201	1534	1311	125	3598	14417	7580	4879	3719	2814	15903	9668	4655	2713	2693	51273	72764	210	7500	29105	15053	9150	6964	4997	22206	13745	6856	4247	4004	124037
Uncomplicated Malaria Tested Positive	18	1615	7907	4392	2448	1794	1130	2748	1835	932	594	473	31	1407	7576	4283	2624	1785	1211	5982	3764	1840	1023	1010	25886	32536	49	3022	15483	8675	5072	3579	2341	8730	5599	2772	1617	1483	58422
Uncomplicated Malaria not tested but treated as malaria	3	250	1131	549	315	212	166	611	354	187	108	98	7	249	950	570	362	235	203	1128	863	338	228	216	3984	5349	10	499	2081	1119	677	447	369	1739	1217	525	336	314	9333
Uncomplicated Malaria Cases Tested Negative but Treated as Malaria
Uncomplicated Malaria in Pregnancy suspected																	9	127	197	1023	249	11				1616					9	127	197	1023	249	11			1616
Uncomplicated Malaria in Pregnancy Suspected Tested																	7	116	178	981	228	11				1521					7	116	178	981	228	11			1521
Uncomplicated Malaria in Pregnancy tested positive																	4	49	71	384	91	11				610					4	49	71	384	91	11			610
Uncomplicated Malaria in Pregnacy not tested but treated as malaria																	1	10	15	22	15					63					1	10	15	22	15				63
Uncomplicated Malaria in Pregnancy Tested Negative but Treated as Malaria
Severe Malaria (Lab-Confirmed)			30	12	4	4		12	10	5		1			19	10	5	4	5	63	35	18	14	13	78	186			49	22	9	8	5	75	45	23	14	14	264
Communicable non-immunizable Age Group and Gender for Patients/Morbidity
Sunyani Municipal 2017
Data element	Male , <28days	Male , 1-11mths	Male , 1-4	Male , 5-9	Male , 10-14	Male , 15-17	Male , 18-19	Male , 20-34	Male , 35-49	Male , 50-59	Male , 60-69	Male , 70+	Female, <28days	Female, 1-11mths	Female, 1-4	Female, 5-9	Female, 10-14	Female, 15-17	Female, 18-19	Female, 20-34	Female, 35-49	Female, 50-59	Female, 60-69	Female, 70+	Male	Female	<28days	1-11mths	1-4	5-9	10-14	15-17	18-19	20-34	35-49	50-59	60-69	70+	Total
Uncomplicated Malaria suspected	93	3923	14842	6931	4081	3586	2118	6030	4035	2196	1586	1585	54	3830	14222	7217	4648	4133	3106	15993	9859	4550	3109	3015	51006	73736	147	7753	29064	14148	8729	7719	5224	22023	13894	6746	4695	4600	124742
Uncomplicated Malaria Suspected Tested	91	3737	14188	6628	3857	3391	1980	5629	3799	2006	1449	1479	51	3582	13540	6858	4460	3881	2921	15332	9307	4340	2955	2861	48234	70088	142	7319	27728	13486	8317	7272	4901	20961	13106	6346	4404	4340	118322
Uncomplicated Malaria Tested Positive	43	1514	6946	3925	2146	1946	1105	2515	1745	892	638	572	27	1443	6597	3924	2443	2014	1361	5514	3597	1676	1176	1099	23987	30871	70	2957	13543	7849	4589	3960	2466	8029	5342	2568	1814	1671	54858
Uncomplicated Malaria not tested but treated as malaria	5	181	647	313	184	145	110	344	224	131	100	81	2	171	571	296	211	173	144	586	383	201	128	102	2465	2968	7	352	1218	609	395	318	254	930	607	332	228	183	5433
Uncomplicated Malaria Cases Tested Negative but Treated as Malaria
Uncomplicated Malaria in Pregnancy suspected																	7	95	241	1327	277	12	3	3		1965					7	95	241	1327	277	12	3	3	1965
Uncomplicated Malaria in Pregnancy Suspected Tested																	7	86	211	1295	239	3				1841					7	86	211	1295	239	3			1841
Uncomplicated Malaria in Pregnancy tested positive																	2	34	90	360	81	2				569					2	34	90	360	81	2			569
Uncomplicated Malaria in Pregnacy not tested but treated as malaria																		6	12	10	9					37						6	12	10	9				37
Uncomplicated Malaria in Pregnancy Tested Negative but Treated as Malaria
Severe Malaria (Lab-Confirmed)		1	7	9	2			3						2	2	5		1			1				22	11		3	9	14	2	1		3	1				33
Communicable non-immunizable Age Group and Gender for Patients/Morbidity
Sunyani Municipal 2018
Data element	Male , <28days	Male , 1-11mths	Male , 1-4	Male , 5-9	Male , 10-14	Male , 15-17	Male , 18-19	Male , 20-34	Male , 35-49	Male , 50-59	Male , 60-69	Male , 70+	Female, <28days	Female, 1-11mths	Female, 1-4	Female, 5-9	Female, 10-14	Female, 15-17	Female, 18-19	Female, 20-34	Female, 35-49	Female, 50-59	Female, 60-69	Female, 70+	Male	Female	<28days	1-11mths	1-4	5-9	10-14	15-17	18-19	20-34	35-49	50-59	60-69	70+	Total
Uncomplicated Malaria suspected	185	4148	16379	9291	5398	4053	2971	6633	4634	2692	2095	1536	182	3928	15588	9243	5797	4280	4099	16796	11097	5094	3633	3176	60015	82913	367	8076	31967	18534	11195	8333	7070	23429	15731	7786	5728	4712	142928
Uncomplicated Malaria Suspected Tested	185	4052	15974	9049	5258	3961	2826	6330	4444	2573	1967	1468	180	3850	15265	9042	5674	4188	3969	16389	10855	4947	3511	3097	58087	80967	365	7902	31239	18091	10932	8149	6795	22719	15299	7520	5478	4565	139054
Uncomplicated Malaria Tested Positive	84	1502	7766	5237	3205	2516	1676	3041	2069	1141	856	631	50	1409	7407	5190	3282	2257	1839	6175	4348	2031	1251	1064	29724	36303	134	2911	15173	10427	6487	4773	3515	9216	6417	3172	2107	1695	66027
Uncomplicated Malaria not tested but treated as malaria	7	71	366	224	129	169	136	259	159	99	63	62		60	299	184	123	139	154	395	212	138	113	61	1744	1878	7	131	665	408	252	308	290	654	371	237	176	123	3622
Uncomplicated Malaria Cases Tested Negative but Treated as Malaria	1	13	10	12	10	9	12	15	16	11	15	11		9	13	10	12	15	17	34	14	5	4	12	135	145	1	22	23	22	22	24	29	49	30	16	19	23	280
Uncomplicated Malaria in Pregnancy suspected																	9	40	106	904	247	11				1317					9	40	106	904	247	11			1317
Uncomplicated Malaria in Pregnancy Suspected Tested																	31	50	89	911	248	11				1340					31	50	89	911	248	11			1340
Uncomplicated Malaria in Pregnancy tested positive																	6	31	53	265	52					407					6	31	53	265	52				407
Uncomplicated Malaria in Pregnacy not tested but treated as malaria																		1	2	10	3					16						1	2	10	3				16
Uncomplicated Malaria in Pregnancy Tested Negative but Treated as Malaria																				1	1					2								1	1				2
Severe Malaria (Lab-Confirmed)			1												2										1	2			3										3
Communicable non-immunizable Age Group and Gender for Patients/Morbidity
Sunyani Municipal 2019
Data element	Male , <28days	Male , 1-11mths	Male , 1-4	Male , 5-9	Male , 10-14	Male , 15-17	Male , 18-19	Male , 20-34	Male , 35-49	Male , 50-59	Male , 60-69	Male , 70+	Female, <28days	Female, 1-11mths	Female, 1-4	Female, 5-9	Female, 10-14	Female, 15-17	Female, 18-19	Female, 20-34	Female, 35-49	Female, 50-59	Female, 60-69	Female, 70+	Male	Female	<28days	1-11mths	1-4	5-9	10-14	15-17	18-19	20-34	35-49	50-59	60-69	70+	Total
Uncomplicated Malaria suspected	235	3527	13355	7699	4647	3562	3156	6367	4569	2753	2092	1664	272	3631	12905	8231	5265	3892	4146	14902	9728	4784	3234	2822	53626	73812	507	7158	26260	15930	9912	7454	7302	21269	14297	7537	5326	4486	127438
Uncomplicated Malaria Suspected Tested	233	3439	13062	7546	4552	3444	3020	6197	4417	2653	2029	1603	272	3553	12765	8132	5157	3754	4014	14641	9589	4676	3164	2761	52195	72478	505	6992	25827	15678	9709	7198	7034	20838	14006	7329	5193	4364	124673
Uncomplicated Malaria Tested Positive	112	1387	7203	4667	2676	2039	1577	3095	2148	1245	891	696	94	1321	6998	4841	2870	1894	1702	5934	4107	2107	1356	1120	27736	34344	206	2708	14201	9508	5546	3933	3279	9029	6255	3352	2247	1816	62080
Uncomplicated Malaria not tested but treated as malaria	2	81	337	177	133	104	135	249	157	94	64	46	22	92	274	168	145	133	179	400	241	135	101	94	1579	1984	24	173	611	345	278	237	314	649	398	229	165	140	3563
Uncomplicated Malaria Cases Tested Negative but Treated as Malaria		13	42	28	16	16	20	24	23	16	6	13	2	23	22	19	24	15	18	38	15	9	7	11	217	203	2	36	64	47	40	31	38	62	38	25	13	24	420
Uncomplicated Malaria in Pregnancy suspected																	8	67	124	442	177	34				852					8	67	124	442	177	34			852
Uncomplicated Malaria in Pregnancy Suspected Tested																	8	64	119	426	171	34				822					8	64	119	426	171	34			822
Uncomplicated Malaria in Pregnancy tested positive																	6	24	38	149	65	11				293					6	24	38	149	65	11			293
Uncomplicated Malaria in Pregnacy not tested but treated as malaria																		1	3	10	5					19						1	3	10	5				19
Uncomplicated Malaria in Pregnancy Tested Negative but Treated as Malaria																	1			2	2					5					1			2	2				5
Severe Malaria (Lab-Confirmed)			1					3	1	1					2	2	1	1	2	1	8	1	4	2	6	24			3	2	1	1	2	4	9	2	4	2	30
Communicable non-immunizable Age Group and Gender for Patients/Morbidity
Sunyani Municipal 2015
Data element	Male , <28days	Male , 1-11mths	Male , 1-4	Male , 5-9	Male , 10-14	Male , 15-17	Male , 18-19	Male , 20-34	Male , 35-49	Male , 50-59	Male , 60-69	Male , 70+	Female, <28days	Female, 1-11mths	Female, 1-4	Female, 5-9	Female, 10-14	Female, 15-17	Female, 18-19	Female, 20-34	Female, 35-49	Female, 50-59	Female, 60-69	Female, 70+	Male	Female	<28days	1-11mths	1-4	5-9	10-14	15-17	18-19	20-34	35-49	50-59	60-69	70+	Total
Uncomplicated Malaria suspected	128	3343	12806	6107	3780	3587	2282	5683	3856	2181	1478	1303	412	3302	11967	6183	4121	3184	3381	13301	8120	3914	2502	2345	46534	62732	540	6645	24773	12290	7901	6771	5663	18984	11976	6095	3980	3648	109266
Uncomplicated Malaria Suspected Tested	100	2830	11023	5233	3250	2467	1712	4732	3154	1766	1136	1059	77	2847	10194	5234	3530	2693	2901	11494	6785	3281	1988	1940	38462	52964	177	5677	21217	10467	6780	5160	4613	16226	9939	5047	3124	2999	91426
Uncomplicated Malaria Tested Positive	64	1568	7290	3650	2102	1375	933	2700	1679	981	651	512	101	1643	6907	3586	2202	1525	1491	5425	3546	1721	1020	915	23505	30082	165	3211	14197	7236	4304	2900	2424	8125	5225	2702	1671	1427	53587
Uncomplicated Malaria not tested but treated as malaria	14	400	1397	693	429	1128	548	645	442	290	210	172	13	327	1292	702	455	348	301	1097	869	417	319	278	6368	6418	27	727	2689	1395	884	1476	849	1742	1311	707	529	450	12786
Uncomplicated Malaria Cases Tested Negative but Treated as Malaria
Uncomplicated Malaria in Pregnancy suspected																2	3	48	87	483	103	1				727				2	3	48	87	483	103	1			727
Uncomplicated Malaria in Pregnancy Suspected Tested																	3	44	73	421	90	1				632					3	44	73	421	90	1			632
Uncomplicated Malaria in Pregnancy tested positive																	3	33	61	341	69	1				508					3	33	61	341	69	1			508
Uncomplicated Malaria in Pregnacy not tested but treated as malaria																	1	3	7	33	6					50					1	3	7	33	6				50
Uncomplicated Malaria in Pregnancy Tested Negative but Treated as Malaria
Severe Malaria (Lab-Confirmed)		7	14	5	4	10	5	11	5	2	9	5		4	13	9	1	1	7	16	6	7	7	6	77	77		11	27	14	5	11	12	27	11	9	16	11	154

## Sheet: monthly distribution of cases
	Sunyani Municipal
years	months	positive cases
2015	Jan	2764
	Feb	2524
	Mar	3810
	Apr	3759
	May	5258
	Jun	7173
	Jul	6015
	Aug	5340
	Sep	3509
	Oct	4282
	Nov	3815
	Dec	5338
2016	Jan	3978
	Feb	3967
	Mar	3137
	Apr	4980
	May	6196
	Jun	6665
	Jul	5565
	Aug	4210
	Sep	3942
	Oct	5274
	Nov	6576
	Dec	4132
2017	Jan	3792
	Feb	3502
	Mar	2922
	Apr	3814
	May	5094
	Jun	4376
	Jul	5129
	Aug	5883
	Sep	5250
	Oct	5667
	Nov	4791
	Dec	4722
2018	Jan	4369
	Feb	4383
	Mar	4923
	Apr	4930
	May	6394
	Jun	5111
	Jul	5220
	Aug	5747
	Sep	5549
	Oct	8067
	Nov	7049
	Dec	4485
2019	Jan	4793
	Feb	3789
	Mar	4438
	Apr	4010
	May	5721
	Jun	6448
	Jul	6790
	Aug	5962
	Sep	4108
	Oct	6108
	Nov	5677
	Dec	4236
